# Supplementary material for: Abnormal sodium and water homeostasis in mice with defective heparan sulfate polymerization
Source: PubMed Central journal article supplement (PMC6668793; doi:10.1371/journal.pone.0220333), 2019-07-31
Supplement: pone.0220333.s002.pdf [file pone.0220333.s002.pdf]

**S2 Figure. Vasodilation is impaired in  $Ext1^{+/-}Ext2^{+/-}$  mice.**

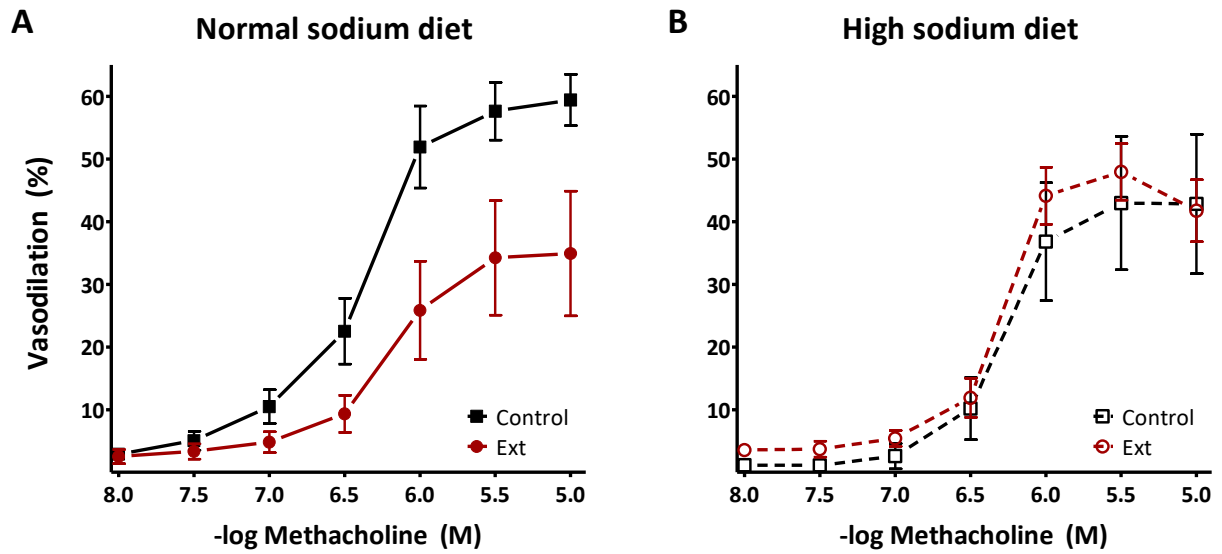

Ex-vivo vasodilation of mesenteric arteries was assessed with wire myography at increasing methacholine concentrations after a normal and high salt diet. (A) Vasodilation in  $Ext1^{+/-}Ext2^{+/-}$  mice (Ext,  $35\pm 10\%$ ,  $n=5$ ) was significantly impaired when compared to control mice ( $59\pm 4\%$ ,  $n=6$ ) during a normal sodium diet ( $p=0.02$ ). (B) Vasodilation responses of  $Ext1^{+/-}Ext2^{+/-}$  ( $42\pm 5\%$ ,  $n=7$ ) and control mice ( $43\pm 11\%$ ,  $n=5$ ) were equal during high sodium intake ( $p=0.62$ ).
